# Supplementary material
Source: HighWire-hosted journal article supplement (https://drc.bmj.com/content/12/1/e003710)
Supplement: inline-supplementary-material-1 [file inline-supplementary-material-1.pdf]

**SUPPLEMENTARY MATERIAL**

**eFigure 1. Kaplan-Meier Survival Curves, by Diabetes Status and SDOH Quartiles.****Panel A. Diabetes Population**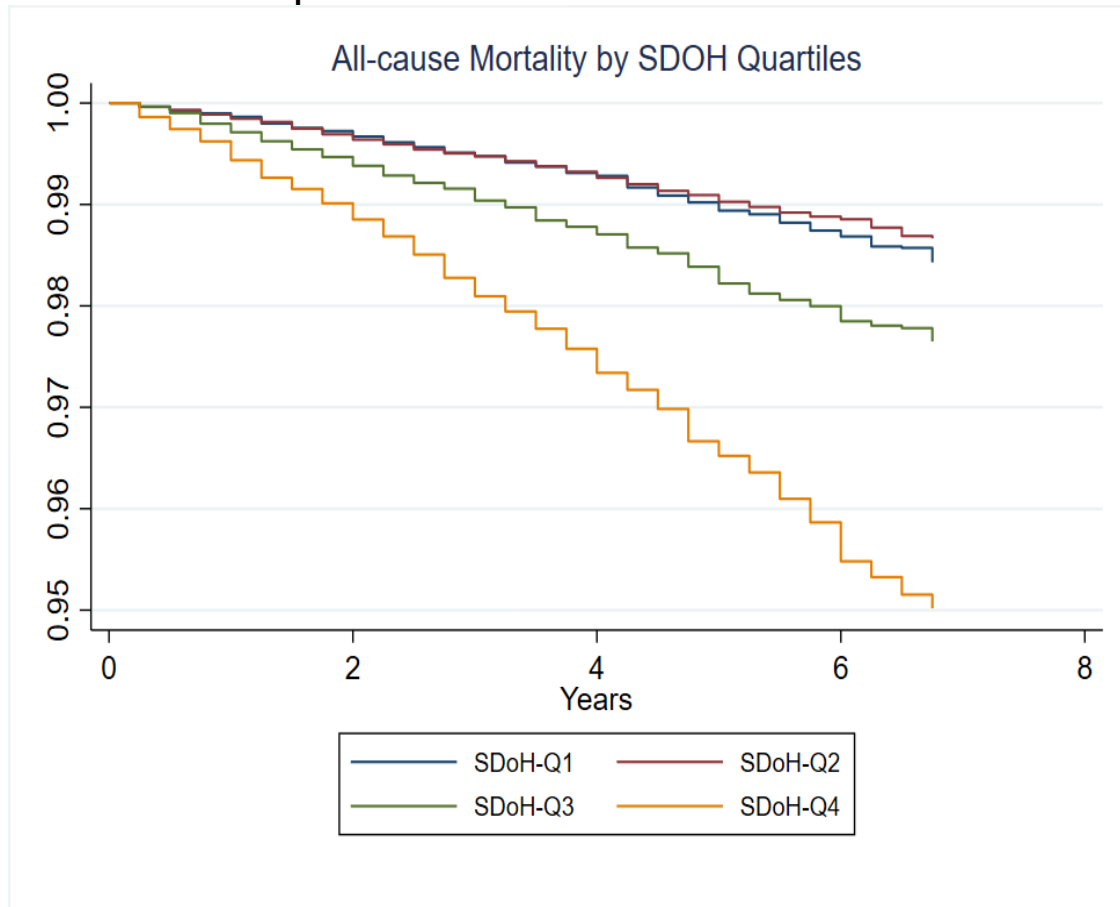

**Panel B. Non-Diabetes Population**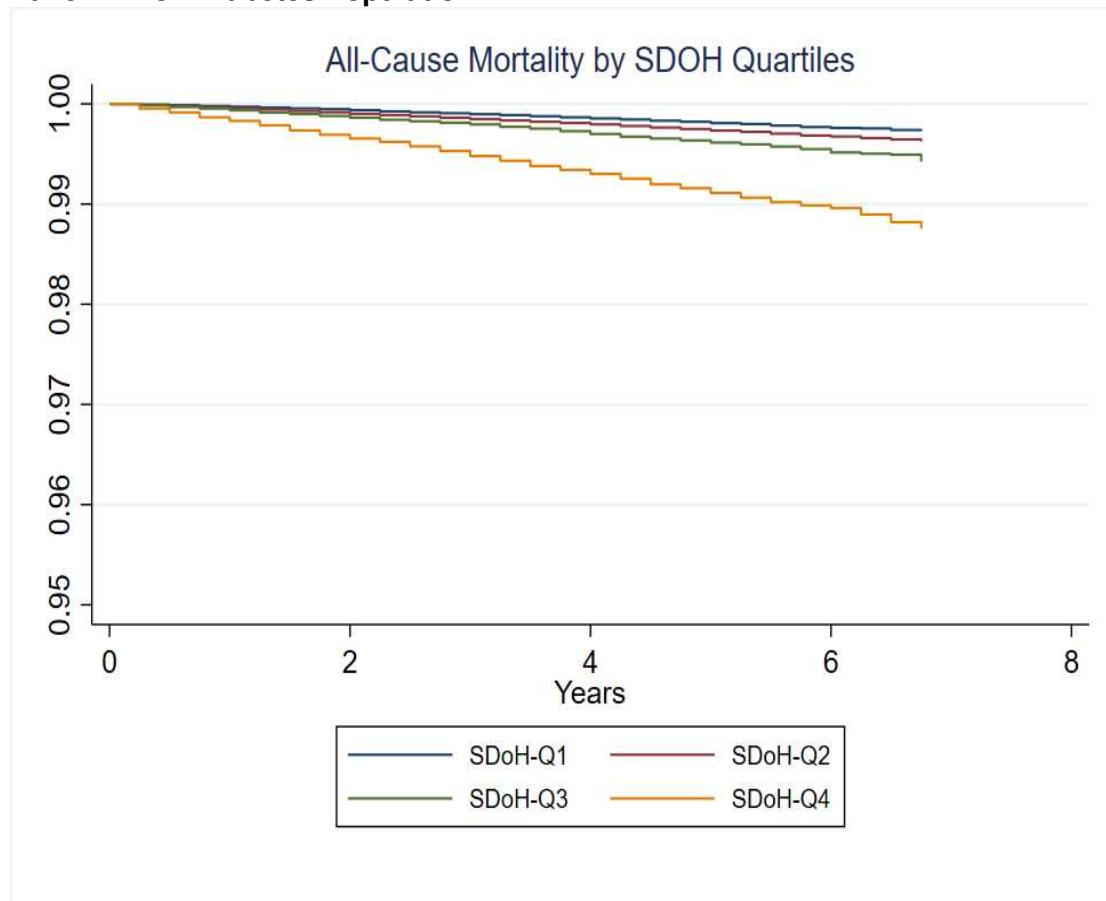

Compared to individuals without diabetes, diabetes patients experienced a greater decrease in survival rate at each quartile of SDOH burden.

**eTable 1. SDOH Characteristics of the Study Population, by Diabetes Status, from the National Health Interview Survey 2013-18.**

|                                                                  | No DM              | DM               | <i>p value</i> |
|------------------------------------------------------------------|--------------------|------------------|----------------|
| Sample (N)                                                       | 162,366            | 20,079           |                |
| Weighted sample, (weighted %)                                    | 215,015,330 (90.3) | 23,211,567 (9.7) |                |
| Employment, n (weighted %)                                       |                    |                  | <0.001         |
| Employed or Retired                                              | 128,962 (78.8)     | 14,152 (70.8)    |                |
| Never or Previously Employed                                     | 33,284 (21.2)      | 5,921 (29.2)     |                |
| Sick Leave, n (weighted %)                                       |                    |                  | 0.23           |
| Paid sick leave at current/most recent job                       | 84,757 (55.7)      | 10,398 (56.4)    |                |
| No paid sick leave                                               | 67,658 (44.3)      | 8,182 (43.6)     |                |
| Family Income, n (weighted %)                                    |                    |                  | <0.001         |
| Middle/High-income                                               | 98,999 (70.3)      | 10,191 (60.5)    |                |
| Low-income                                                       | 52,218 (29.7)      | 8,406 (39.5)     |                |
| Difficulty Paying Medical Bills, n (weighted %)                  |                    |                  | <0.001         |
| No DPMB                                                          | 122,829 (79.8)     | 13,874 (75.8)    |                |
| DPMB                                                             | 28,168 (20.2)      | 3,954 (24.2)     |                |
| Unable to Pay Medical Bills, n (weighted %)                      |                    |                  | <0.001         |
| No DPMB                                                          | 150,997 (92.7)     | 17,828 (88.3)    |                |
| Unable to Pay Med Bills                                          | 11,369 (7.3)       | 2,251 (11.7)     |                |
| Worried about money for retirement, n (weighted %)               |                    |                  | <0.001         |
| Not too worried/Not at all                                       | 87,637 (55.1)      | 10,381 (50.6)    |                |
| Mod/Very Worried about money for retirement                      | 70,633 (44.9)      | 9,191 (49.4)     |                |
| Worried about med costs of illness/accident, n (weighted %)      |                    |                  | <0.001         |
| Not too worried/Not at all                                       | 91,983 (57.8)      | 11,092 (54.5)    |                |
| Mod/Very Worried about med costs of illness/accident             | 66,345 (42.2)      | 8,498 (45.5)     |                |
| Worried about maintaining std of living, n (weighted %)          |                    |                  | <0.001         |
| Not too worried/Not at all                                       | 99,753 (62.8)      | 11,290 (56.2)    |                |
| Mod/Very Worried about maintaining std of living                 | 58,552 (37.2)      | 8,299 (43.8)     |                |
| Worried about medical costs of normal healthcare, n (weighted %) |                    |                  | <0.001         |
| Not too worried/Not at all                                       | 113,971 (71.7)     | 13,243 (65.4)    |                |
| Mod/Very Worried about medical costs of normal healthcare        | 44,373 (28.3)      | 6,355 (34.6)     |                |
| Worried about paying monthly bills, n (weighted %)               |                    |                  | <0.001         |
| Not too worried/Not at all                                       | 114,353 (72.5)     | 12,731 (63.9)    |                |
| Mod/Very Worried about paying monthly bills                      | 44,012 (27.5)      | 6,866 (36.1)     |                |
| Worried about paying rent/mortgage/housing costs, n (weighted %) |                    |                  | <0.001         |
| Not too worried/Not at all                                       | 123,259 (78.1)     | 14,330 (71.8)    |                |
| Mod/Very Worried about paying rent/mortgage/housing costs        | 35,090 (21.9)      | 5,266 (28.2)     |                |
| Foregone/Delayed Care due to Cost, n (weighted %)                |                    |                  | <0.001         |
| No Delay Medical Care due to Cost                                | 143,769 (90.1)     | 17,365 (87.1)    |                |

|                                                                        |                |               |        |
|------------------------------------------------------------------------|----------------|---------------|--------|
| Foregone/Delayed Medical Care due to Cost                              | 18,597 (9.9)   | 2,714 (12.9)  |        |
| House Tenure, n (weighted %)                                           |                |               | <0.001 |
| Own or being bought                                                    | 98,175 (65.3)  | 12,825 (68.8) |        |
| Rent/Other arrangement                                                 | 63,915 (34.7)  | 7,228 (31.2)  |        |
| Agree: People in neighborhood help each other, n (weighted %)          |                |               | <0.001 |
| Yes                                                                    | 127,102 (83.0) | 15,106 (79.2) |        |
| No                                                                     | 26,826 (17.0)  | 3,960 (20.8)  |        |
| Agree: There are people I can count on in neighborhood, n (weighted %) |                |               | <0.001 |
| Yes                                                                    | 127,036 (82.4) | 15,449 (80.4) |        |
| No                                                                     | 27,609 (17.6)  | 3,723 (19.6)  |        |
| Agree: People in neighborhood can be trusted, n (weighted %)           |                |               | <0.001 |
| Yes                                                                    | 127,580 (83.8) | 15,262 (80.9) |        |
| No                                                                     | 26,056 (16.2)  | 3,707 (19.1)  |        |
| Agree: This is a close-knit neighborhood, n (weighted %)               |                |               | <0.001 |
| Yes                                                                    | 99,257 (64.7)  | 12,029 (62.5) |        |
| No                                                                     | 55,104 (35.3)  | 7,098 (37.5)  |        |
| ≥ 3 days did not eat, n (weighted %)                                   |                |               | <0.001 |
| No                                                                     | 160,654 (99.1) | 19,746 (98.7) |        |
| Yes                                                                    | 1,712 (0.9)    | 333 (1.3)     |        |
| Kessler K6 Scale, n (weighted %)                                       |                |               | <0.001 |
| No Psychological Distress                                              | 152,006 (96.8) | 18,143 (93.4) |        |
| Psychological Distress                                                 | 5,429 (3.2)    | 1,333 (6.6)   |        |
| Marital status, n (weighted %)                                         |                |               | <0.001 |
| Never married/living with partner                                      | 49,955 (31.7)  | 3,337 (15.8)  |        |
| Married                                                                | 71,686 (52.5)  | 8,557 (55.2)  |        |
| Previously married                                                     | 40,437 (15.8)  | 8,148 (29.0)  |        |
| Hungry but did not eat because not enough money, n (weighted %)        |                |               | <0.001 |
| No                                                                     | 156,879 (97.0) | 18,949 (94.9) |        |
| Yes                                                                    | 5,487 (3.0)    | 1,130 (5.1)   |        |
| Eat less than felt should because not enough money, n (weighted %)     |                |               | <0.001 |
| No                                                                     | 153,337 (94.9) | 18,134 (91.3) |        |
| Yes                                                                    | 9,029 (5.1)    | 1,945 (8.7)   |        |
| Cut size or skipped meals because not enough money, n (weighted %)     |                |               | <0.001 |
| No                                                                     | 152,507 (94.6) | 18,033 (90.9) |        |
| Yes                                                                    | 9,859 (5.4)    | 2,046 (9.1)   |        |
| ≥ 3 days cut size or skipped meals, n (weighted %)                     |                |               | <0.001 |
| No                                                                     | 154,358 (95.6) | 18,351 (92.3) |        |
| Yes                                                                    | 8,008 (4.4)    | 1,728 (7.7)   |        |
| Could not afford to eat balanced meals, n (weighted %)                 |                |               | <0.001 |
| No                                                                     | 145,255 (90.3) | 16,418 (83.3) |        |

|                                                                              |                |               |        |
|------------------------------------------------------------------------------|----------------|---------------|--------|
| Yes                                                                          | 17,111 (9.7)   | 3,661 (16.7)  |        |
| Worried food would run out before getting money to buy more, n (weighted %)  |                |               | <0.001 |
| No                                                                           | 139,936 (87.0) | 15,766 (79.9) |        |
| Yes                                                                          | 22,430 (13.0)  | 4,313 (20.1)  |        |
| Food did not last before getting money to get more, n (weighted %)           |                |               | <0.001 |
| No                                                                           | 143,299 (89.1) | 16,142 (81.9) |        |
| Yes                                                                          | 19,067 (10.9)  | 3,937 (18.1)  |        |
| Lose weight because not enough money for food, n (weighted %)                |                |               | <0.001 |
| No                                                                           | 159,102 (98.2) | 19,289 (96.6) |        |
| Yes                                                                          | 3,264 (1.8)    | 790 (3.4)     |        |
| Not eat for a whole day because not enough money for food, n (weighted %)    |                |               | <0.001 |
| No                                                                           | 159,890 (98.7) | 19,588 (98.0) |        |
| Yes                                                                          | 2,476 (1.3)    | 491 (2.0)     |        |
| English Language, n (weighted %)                                             |                |               | <0.001 |
| Well/Very well                                                               | 140,468 (94.7) | 16,995 (91.7) |        |
| Not well/Not at all                                                          | 7,547 (5.3)    | 1,400 (8.3)   |        |
| Education, n (weighted %)                                                    |                |               | <0.001 |
| ≥ Some college                                                               | 102,089 (63.7) | 9,831 (50.5)  |        |
| ≤ High School                                                                | 59,685 (36.3)  | 10,146 (49.5) |        |
| Looked up health info on Internet in past 12 m, n (weighted %)               |                |               | <0.001 |
| Yes                                                                          | 79,649 (51.9)  | 7,076 (39.2)  |        |
| No                                                                           | 80,483 (48.1)  | 12,736 (60.8) |        |
| Filled a prescription on Internet in past 12 m, n (weighted %)               |                |               | <0.001 |
| Yes                                                                          | 12,995 (8.7)   | 2,114 (12.3)  |        |
| No                                                                           | 147,195 (91.3) | 17,700 (87.7) |        |
| Scheduled medical appointment on Internet in past 12 m, n (weighted %)       |                |               | <0.001 |
| Yes                                                                          | 15,811 (11.3)  | 1,494 (9.4)   |        |
| No                                                                           | 144,358 (88.7) | 18,320 (90.6) |        |
| Communicated with health care provider by email in past 12 m, n (weighted %) |                |               | 0.51   |
| Yes                                                                          | 17,140 (11.7)  | 2,033 (11.9)  |        |
| No                                                                           | 143,025 (88.3) | 17,777 (88.1) |        |
| Insurance Status, n (weighted %)                                             |                |               | <0.001 |
| Insured                                                                      | 141,049 (87.8) | 18,730 (93.2) |        |
| Uninsured                                                                    | 19,622 (12.2)  | 1,177 (6.8)   |        |
| Usual Source of Care, n (weighted %)                                         |                |               | <0.001 |
| Usual source of care                                                         | 137,624 (85.0) | 19,256 (96.1) |        |
| No usual source of care                                                      | 23,652 (15.0)  | 697 (3.9)     |        |
| Citizenship Status, n (weighted %)                                           |                |               | <0.001 |
| US Citizens                                                                  | 149,252 (91.6) | 19,028 (93.7) |        |
| Non-Citizens                                                                 | 12,908 (8.4)   | 1,037 (6.3)   |        |

|                                                                     |                |               |        |
|---------------------------------------------------------------------|----------------|---------------|--------|
| Delayed Medical Care: Couldn't get through on phone, n (weighted %) |                |               | <0.001 |
| No                                                                  | 157,183 (97.7) | 19,234 (96.5) |        |
| Yes: Couldn't get through on phone                                  | 3,894 (2.3)    | 690 (3.5)     |        |
| Delayed Medical Care: Couldn't get appt soon enough, n (weighted %) |                |               | <0.001 |
| No                                                                  | 151,440 (94.1) | 18,292 (91.3) |        |
| Yes: Couldn't get appt soon enough                                  | 9,615 (5.9)    | 1,632 (8.7)   |        |
| Delayed Medical Care: Wait too long at MD's office, n (weighted %)  |                |               | <0.001 |
| No                                                                  | 154,732 (96.2) | 18,714 (93.6) |        |
| Yes: Wait too long at MD's office                                   | 6,307 (3.8)    | 1,209 (6.4)   |        |
| Delayed Medical Care: Not open when you could go, n (weighted %)    |                |               | <0.001 |
| No                                                                  | 156,478 (97.2) | 19,228 (96.3) |        |
| Yes: Not open when you could go                                     | 4,561 (2.8)    | 692 (3.7)     |        |
| Delayed Medical Care: Transport, n (weighted %)                     |                |               | <0.001 |
| No                                                                  | 157,854 (98.4) | 18,985 (96.0) |        |
| Yes                                                                 | 3,198 (1.6)    | 939 (4.0)     |        |
| Quality of Care (Satisfaction), n (weighted %)                      |                |               | <0.001 |
| Somewhat/Very Satisfied                                             | 132,217 (83.1) | 18,006 (91.0) |        |
| Somewhat/Very Dissatisfied                                          | 26,640 (16.9)  | 1,644 (9.0)   |        |

eTable 2.

## Panel A. Age-Adjusted Mortality Rates, Diabetes Population

|                           | SDOH-Q1                 | SDOH-Q2                 | SDOH-Q3                 | SDOH-Q4                 |
|---------------------------|-------------------------|-------------------------|-------------------------|-------------------------|
| <b>Total Population</b>   | 1052.7 (884.9, 1220.5)  | 1752.8 (1542.0, 1963.6) | 1894.6 (1665.4, 2123.7) | 2073.1 (1827.2, 2319.0) |
| <b>Sub-group Analysis</b> |                         |                         |                         |                         |
| Age Category              |                         |                         |                         |                         |
| 18-39                     | 225.8 (92.8, 358.8)     | 376.0 (158.3, 593.6)    | 406.4 (167.2, 645.6)    | 444.7 (188.0, 701.3)    |
| 40-64                     | 852.8 (688.3, 1017.2)   | 1419.9 (1178.2, 1661.6) | 1534.8 (1296.3, 1773.2) | 1679.4 (1433.1, 1925.7) |
| 65+                       | 3168.3 (2669.3, 3667.3) | 5275.4 (4689.2, 5861.5) | 5702.0 (5030.5, 6373.5) | 6239.3 (5440.8, 7037.9) |
| Sex                       |                         |                         |                         |                         |
| Male                      | 1191.6 (996.5, 1386.7)  | 2040.9 (1771.9, 2309.9) | 2254.2 (1955.5, 2552.8) | 2539.6 (2191.1, 2888.2) |
| Female                    | 831.8 (682.1, 981.4)    | 1424.7 (1228.0, 1621.4) | 1573.5 (1355.7, 1791.3) | 1772.8 (1542.4, 2003.1) |
| Race/Ethnicity            |                         |                         |                         |                         |
| Non-Hispanic White        | 1116.4 (933.8, 1299.0)  | 1884.8 (1646.6, 2123.1) | 2131.2 (1860.5, 2401.9) | 2449.8 (2111.6, 2788.0) |
| Non-Hispanic Black        | 1000.2 (794.4, 1206.0)  | 1688.7 (1404.2, 1973.2) | 1909.4 (1582.0, 2236.8) | 2194.8 (1848.2, 2541.5) |
| Non-Hispanic Asian        | 677.0 (392.8, 961.2)    | 1143.0 (659.9, 1626.1)  | 1292.4 (742.5, 1842.3)  | 1485.6 (846.6, 2124.6)  |
| Hispanic                  | 641.2 (485.9, 796.4)    | 1082.5 (843.7, 1321.4)  | 1224.0 (966.0, 1482.0)  | 1407.0 (1140.1, 1673.8) |
| CRF Profile               |                         |                         |                         |                         |
| Optimal                   | 902.7 (683.8, 1121.6)   | 1503.9 (1161.1, 1846.7) | 1618.2 (1265.3, 1971.0) | 1788.0 (1388.9, 2187.1) |
| Average                   | 1137.4 (932.4, 1342.4)  | 1894.9 (1639.1, 2150.6) | 2038.9 (1749.3, 2328.4) | 2252.9 (1945.5, 2560.2) |
| Poor                      | 1012.2 (838.0, 1186.4)  | 1686.3 (1448.8, 1923.9) | 1814.5 (1563.2, 2065.7) | 2004.9 (1731.4, 2278.4) |
| Comorbidities             |                         |                         |                         |                         |
| 0                         | 651.5 (520.6, 782.4)    | 1061.8 (878.0, 1245.7)  | 1120.0 (917.2, 1322.8)  | 1143.5 (946.7, 1340.4)  |



|     |                         |                         |                         |                         |
|-----|-------------------------|-------------------------|-------------------------|-------------------------|
| 1   | 961.9 (772.8, 1151.0)   | 1567.8 (1316.7, 1818.9) | 1653.6 (1379.7, 1927.6) | 1688.4 (1417.4, 1959.4) |
| ≥ 2 | 1859.0 (1514.9, 2203.1) | 3029.8 (2554.9, 3504.8) | 3195.8 (2714.4, 3677.2) | 3262.9 (2787.4, 3738.5) |

**Panel B. Age-Adjusted Mortality Rates, Non-Diabetes Population**

|                           | SDOH-Q1                 | SDOH-Q2                 | SDOH-Q3                 | SDOH-Q4                 |
|---------------------------|-------------------------|-------------------------|-------------------------|-------------------------|
| <b>Total Population</b>   | 562.2 (518.7, 605.6)    | 1064.8 (997.5, 1132.1)  | 1093.1 (1007.2, 1179.0) | 1428.5 (1311.1, 1545.9) |
| <b>Sub-group Analysis</b> |                         |                         |                         |                         |
| <b>Age Category</b>       |                         |                         |                         |                         |
| <i>18-39</i>              | 53.1 (43.2, 63.1)       | 100.6 (81.5, 119.8)     | 103.3 (83.4, 123.2)     | 135.0 (108.5, 161.5)    |
| <i>40-64</i>              | 283.6 (253.1, 314.1)    | 537.2 (483.8, 590.6)    | 551.4 (493.1, 609.8)    | 720.7 (644.2, 797.2)    |
| <i>65+</i>                | 2104.1 (1935.9, 2272.3) | 3985.3 (3727.8, 4242.8) | 4091.2 (3757.5, 4424.8) | 5346.6 (4888.6, 5804.6) |
| <b>Sex</b>                |                         |                         |                         |                         |
| <i>Male</i>               | 667.6 (611.6, 723.6)    | 1298.2 (1205.6, 1390.8) | 1338.7 (1221.5, 1455.9) | 1769.8 (1609.4, 1930.3) |
| <i>Female</i>             | 460.9 (420.9, 500.8)    | 896.2 (830.1, 962.3)    | 924.2 (844.8, 1003.5)   | 1221.8 (1113.6, 1330.0) |
| <b>Race/Ethnicity</b>     |                         |                         |                         |                         |
| <i>Non-Hispanic White</i> | 582.0 (536.4, 627.7)    | 1113.4 (1040.3, 1186.4) | 1187.2 (1088.8, 1285.7) | 1645.0 (1494.2, 1795.9) |
| <i>Non-Hispanic Black</i> | 609.2 (528.9, 689.5)    | 1165.4 (1028.1, 1302.6) | 1242.7 (1090.0, 1395.4) | 1721.9 (1508.0, 1935.8) |
| <i>Non-Hispanic Asian</i> | 338.0 (251.7, 424.3)    | 646.5 (482.4, 810.6)    | 689.4 (520.6, 858.2)    | 955.2 (711.1, 1199.3)   |
| <i>Hispanic</i>           | 303.2 (243.3, 363.1)    | 579.9 (468.8, 691.0)    | 618.4 (494.6, 742.2)    | 856.8 (702.6, 1011.1)   |
| <b>CRF Profile</b>        |                         |                         |                         |                         |
| <i>Optimal</i>            | 430.8 (385.9, 475.7)    | 802.7 (728.7, 876.7)    | 809.5 (720.9, 898.1)    | 1021.6 (903.0, 1140.1)  |

|                |                        |                         |                         |                         |
|----------------|------------------------|-------------------------|-------------------------|-------------------------|
| <i>Average</i> | 635.3 (580.7, 690.0)   | 1183.9 (1096.3, 1271.5) | 1193.9 (1091.0, 1296.8) | 1506.7 (1369.8, 1643.6) |
| <i>Poor</i>    | 670.3 (599.3, 741.2)   | 1249.0 (1132.8, 1365.3) | 1259.6 (1133.6, 1385.6) | 1589.6 (1428.7, 1750.5) |
| Comorbidities  |                        |                         |                         |                         |
| <i>0</i>       | 350.5 (315.7, 385.4)   | 660.7 (604.0, 717.4)    | 665.8 (597.5, 734.1)    | 816.0 (730.2, 901.8)    |
| <i>1</i>       | 584.4 (530.9, 638.0)   | 1101.5 (1006.4, 1196.7) | 1110.0 (1008.0, 1211.9) | 1360.5 (1229.3, 1491.7) |
| $\geq 2$       | 1090.6 (985.4, 1195.9) | 2055.6 (1880.0, 2231.2) | 2071.4 (1871.1, 2271.7) | 2538.8 (2284.9, 2792.7) |
